# Supplementary material
Source: PubMed Central journal article supplement (PMC7611300)
Supplement: EMS128820-supplement-Supplementary_Fig__S1.pdf [file EMS128820-supplement-Supplementary_Fig__S1.pdf]

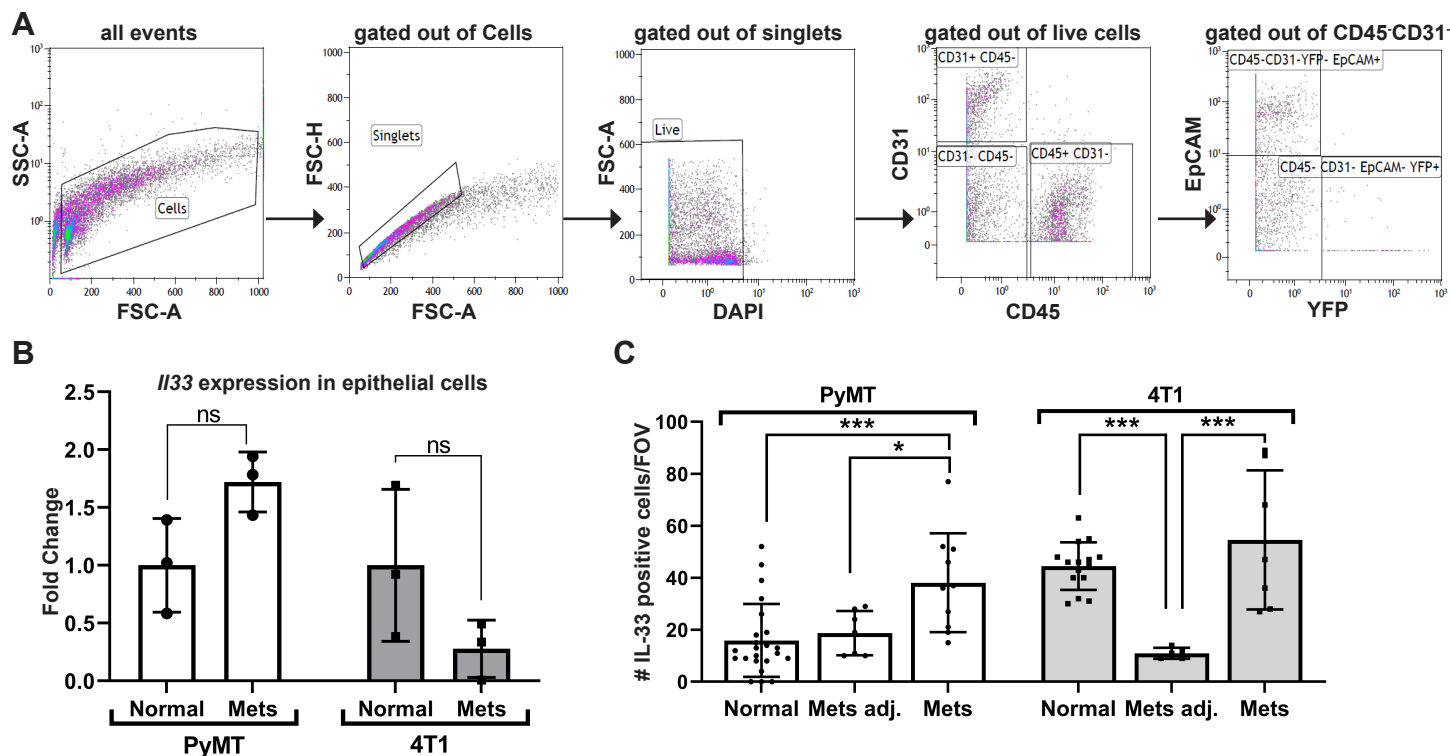

**Supplementary Figure S1. IL-33 is upregulated in metastases-associated fibroblasts at the lung metastatic microenvironment. (A)** Gating strategy for flow cytometry cell sorting of lung populations from FVB/n;Col1a1-YFP, MMTV-PyMT;Col1a1-YFP and BALB/c;Col1a1-YFP: immune cells (CD45<sup>+</sup>CD31<sup>-</sup>), endothelial cells (CD31<sup>+</sup>CD45<sup>-</sup>), epithelial/tumor cells (EpCAM<sup>+</sup>CD45<sup>-</sup>CD31<sup>-</sup>) or fibroblasts (YFP<sup>+</sup>CD45<sup>-</sup>CD31<sup>-</sup>EpCAM<sup>-</sup>). **(B)** Expression of IL33 in epithelial cells sorted from MMTV-PyMT;Col1a1-YFP transgenic mice (n=3) vs. normal FVB/n;Col1a1-YFP controls (n=3) and BALB/c;Col1a1-YFP mice bearing 4T1 metastases (n=3) vs. BALB/c;Col1a1-YFP controls (n=3). Data are presented as fold change  $\pm$  SD. Welch's t-test, ns-not significant. **(C)** Quantification of the number IL-33<sup>+</sup> cells per field of view (FOV) in IL-33 staining of normal lungs and metastases bearing lungs presented in Figure 2A. FVB/n normal lungs vs. PyMT-MMTV metastases-bearing lungs and BALB/c normal lungs vs. BALB/c mice bearing 4T1 tumor cell metastases following orthotopic injection. 6-8 fields of view -FOV/lung were analyzed. Normal: Normal lungs, Mets adj: lung areas without metastases, Mets: metastases. One-way ANOVA with Tukey's correction for multiple comparisons. \*P<0.05, \*\*\*P<0.001.
