# Supplementary material
Source: PubMed Central journal article supplement (PMC7611300)
Supplement: EMS128820-supplement-Supplementary_Fig__S3.pdf [file EMS128820-supplement-Supplementary_Fig__S3.pdf]

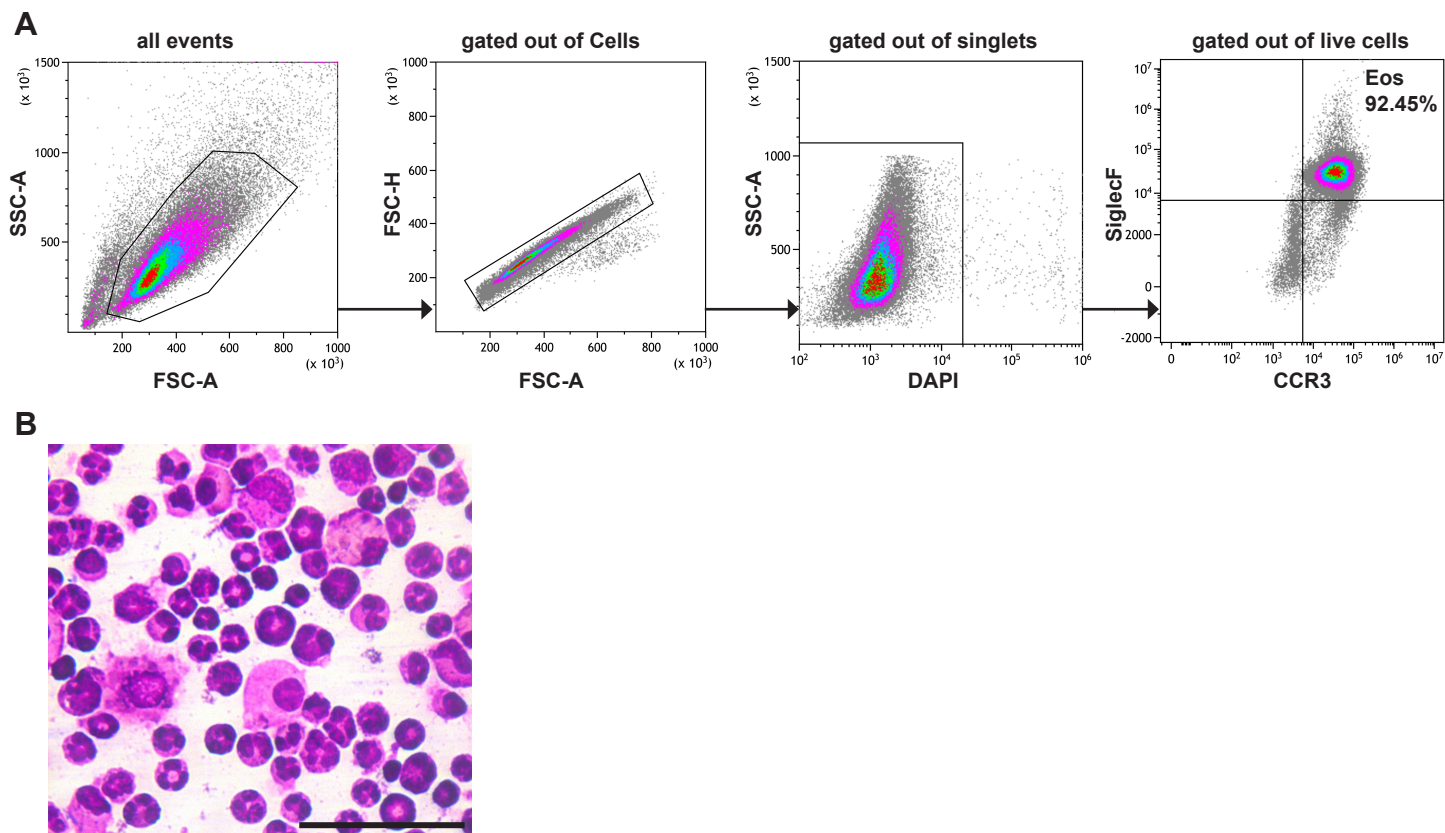

**Supplementary Figure S3. Bone marrow-derived eosinophil preparation. (A)** Representative flow cytometry analysis of eosinophil culture purity following expansion in vitro. **(B)** Differential Quick Stain of bone marrow-derived eosinophils.
