# Supplementary material
Source: PubMed Central journal article supplement (PMC7611300)
Supplement: EMS128820-supplement-Supplementary_Fig__S4.pdf [file EMS128820-supplement-Supplementary_Fig__S4.pdf]

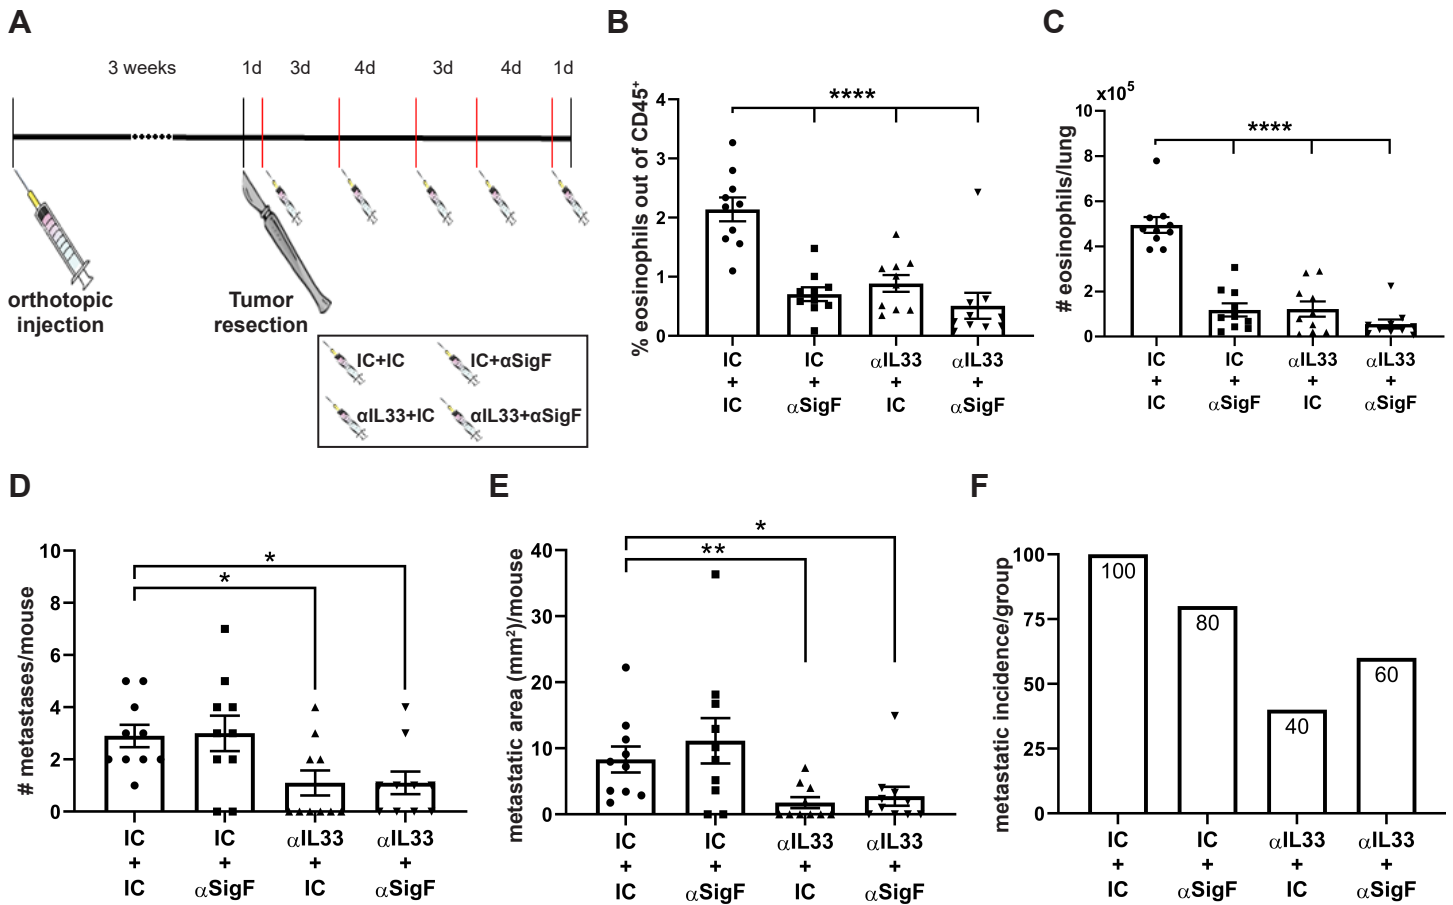

### Supplementary Figure S4. IL-33 is essential for eosinophil recruitment to the metastatic lung. (A)

Experimental design of IL-33 inhibition and eosinophils elimination in vivo: Mice were orthotopically injected with 4T1 cells. Following primary tumor resection, mice were injected with one of the following combinations: anti-IL-33 antibody + Isotype control (αIL33+IC), anti SiglecF + Isotype control (αSigF+IC), αSigF+αIL33 or IC+IC. Injections were administered twice weekly for 5 injections in total. n=10 mice per group. (B-C) Flow cytometry analysis of the percent of eosinophils out of CD45<sup>+</sup> cells (B) and number of eosinophils per lung (C). One-way ANOVA with Dunnet's correction for multiple comparisons \*\*\*\*P<0.0001. (D-E) Quantification of metastatic burden by CT scans analyzing the number of metastases per lung (D), and the area of metastases per lung (E). One-way ANOVA with Dunnet's correction for multiple comparisons \*P<0.05, \*\*P<0.01. (G) Percent of mice that developed metastases in each group.
